# Supplementary material
Source: PubMed Central journal article supplement (PMC7343619)
Supplement: NIHMS1589981-supplement-3.pdf [file NIHMS1589981-supplement-3.pdf]

Yeast Extract, Agar, Glucose    Minimal Media, Glucose

*A. nidulans* A4

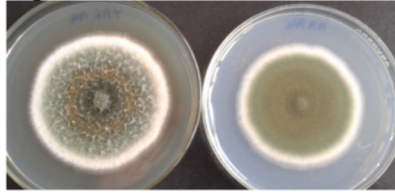

*A. quadrilineatus* NRRL 201<sup>T</sup>

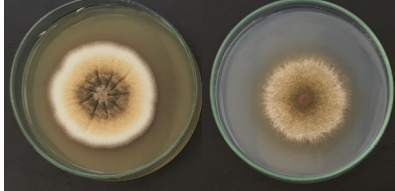

*A. spinulosporus* 4060

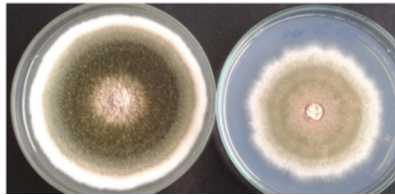

*A. latus* MM151978

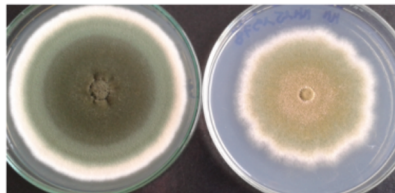

*A. latus* NIH

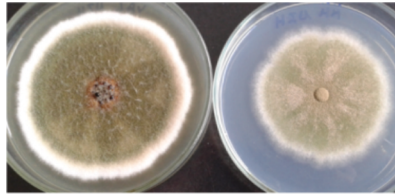

*A. latus* ASFU1710

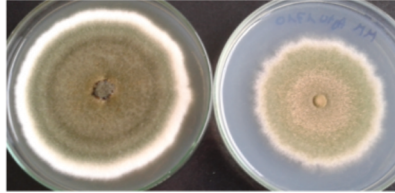

*A. latus* ASFU1908

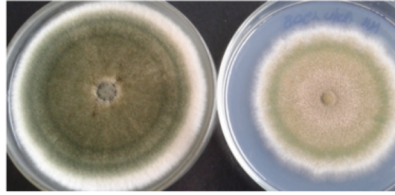

*A. latus* ASFU2033

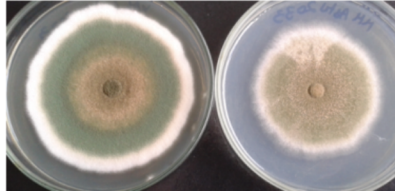

*A. latus* MO46149

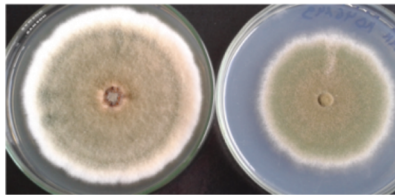

**Figure S1. The growth and appearance of the 7 clinical isolates is similar to those of *Aspergillus nidulans*. Related to Figure 1, Table 1 and STAR Methods.** Clinical isolates were originally identified as *A. nidulans*. Growth in yeast extract, agar, and glucose (YAG) media and in minimal media supplemented with glucose reveals that the growth and appearance of the clinical isolates appears to be superficially similar to those of the reference A4 strain of *A. nidulans*. We also included *A. quadrilineatus* NRRL 201<sup>T</sup> for comparative purposes.

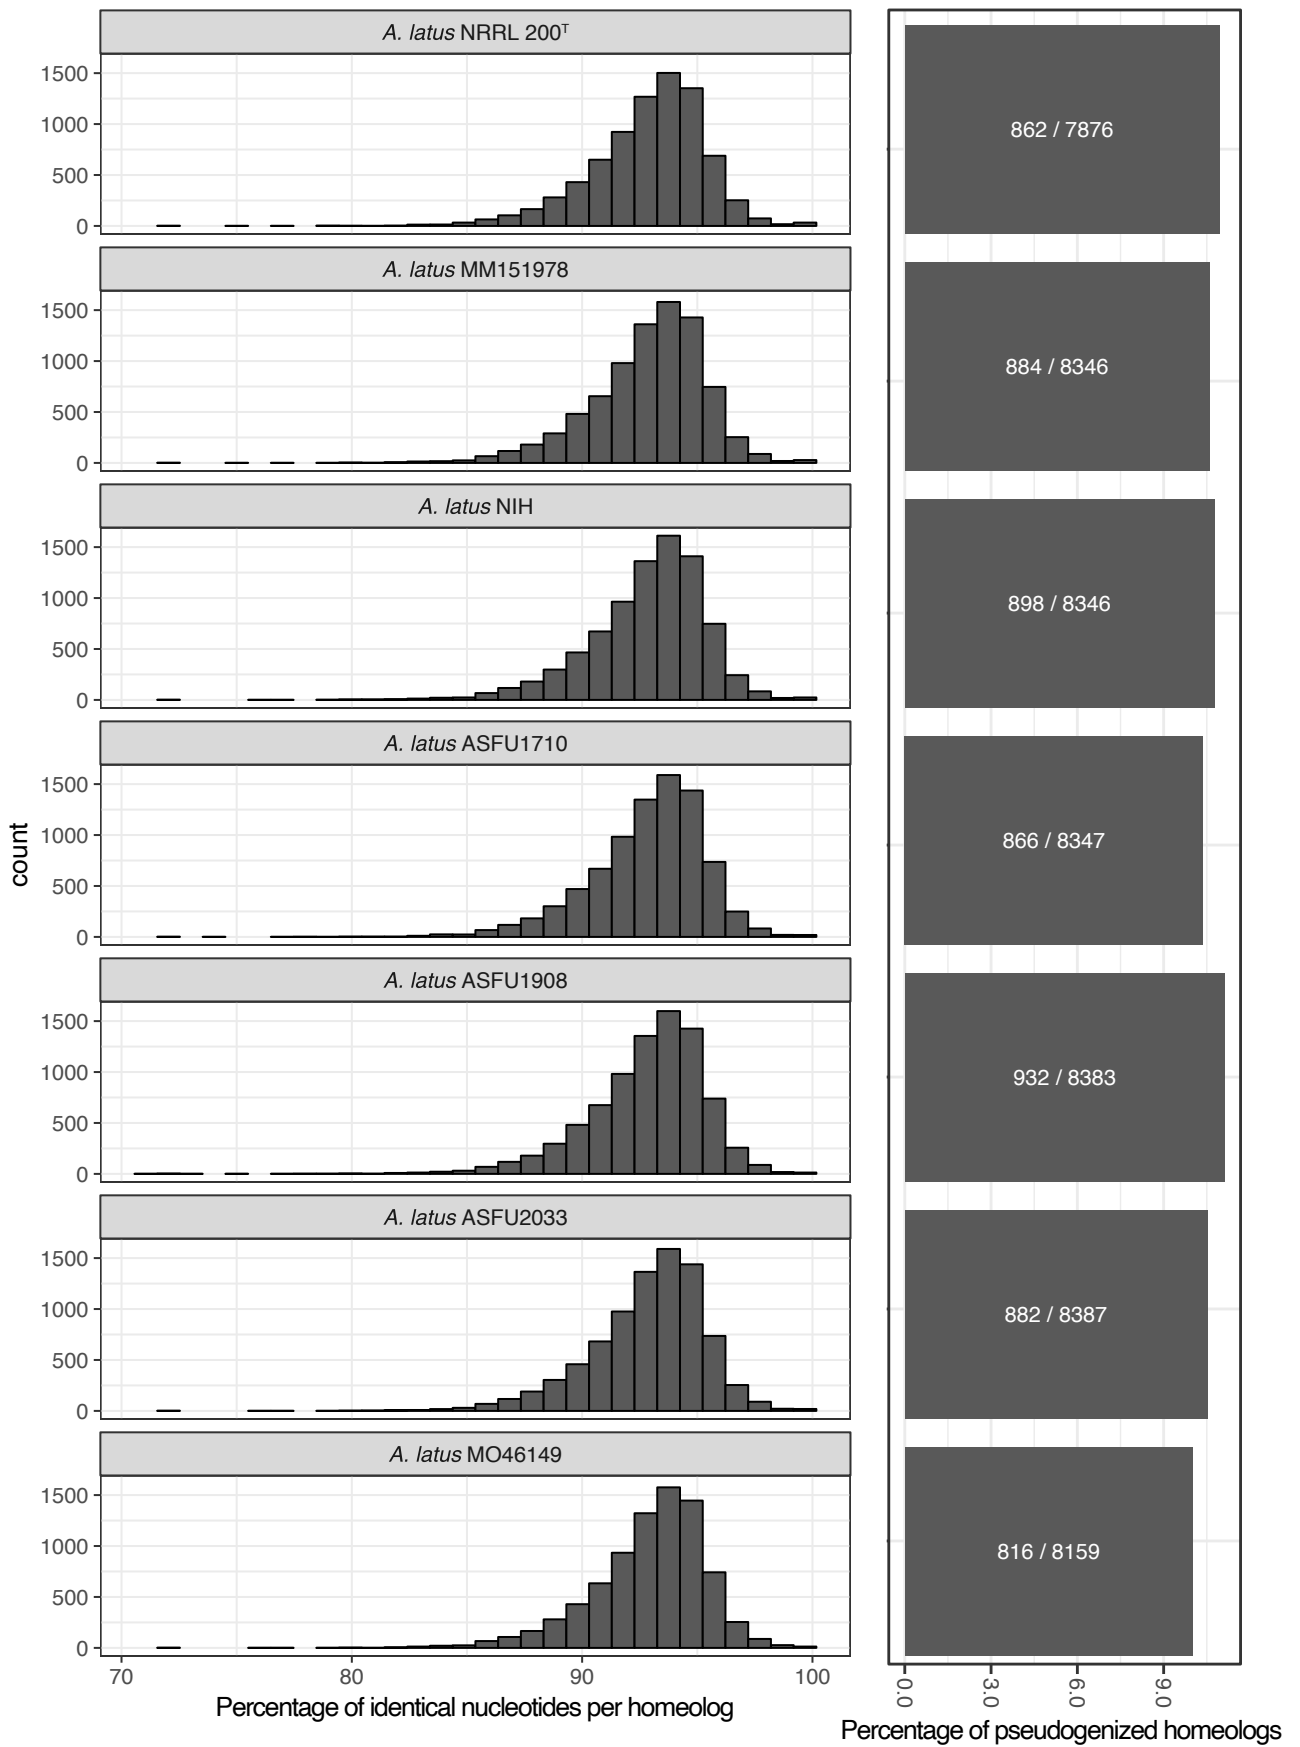

**Figure S2. The parental genomes of *A. latus* hybrid isolates exhibit considerable sequence divergence and have undergone little pseudogenization. Related to Figure 2. (Left)**

Homeologous gene pairs in *A. latus* genomes were identified using a reciprocal best blast hit approach. Sequence similarity of each gene pair was measured by the percentage of identical nucleotides per homeolog. Across the 7 *A. latus* hybrids, homeolog nucleotide sequence similarity is  $92.85 \pm 0.03\%$  suggesting the parental genomes are  $\sim 7.15\%$  diverged from one another. This level of divergence is on par with the sequence divergence observed between humans and lemurs (*Homo sapiens* vs. *Microcebus murinus* divergence measured using the same reciprocal best blast hit approach is 8.36%). (Right) The average percentage of pseudogenized homeologs in *A. latus* hybrid isolates is  $11.67 \pm 0.004\%$ . The percentage of pseudogenized homeologs in each hybrid isolate was calculated by comparing gene lengths between homeologs. One gene in a homeolog pair was considered pseudogenized if their length was shorter (upper threshold of 80%) than the other gene in the homeolog pair.

**A**

***A. spinulosporus* phylogenomic data matrix**

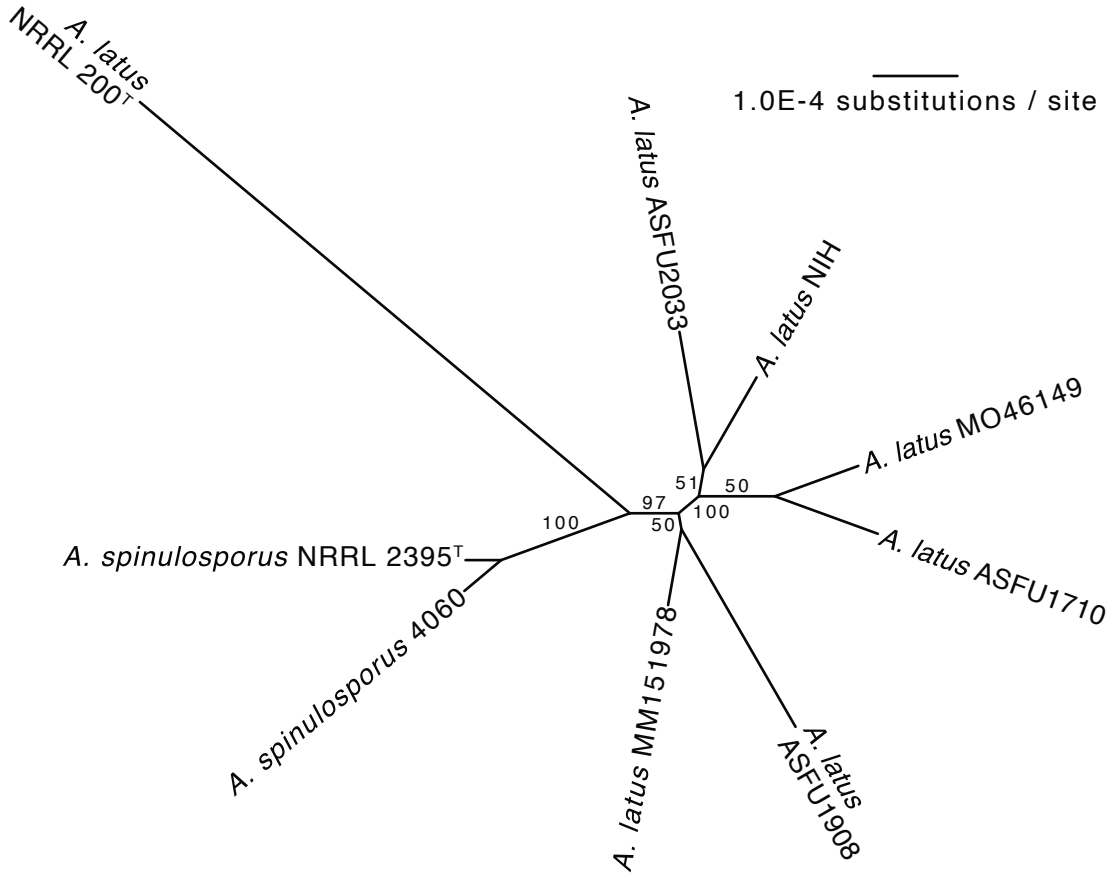

**B**

***A. quadrilineatus*-like phylogenomic data matrix**

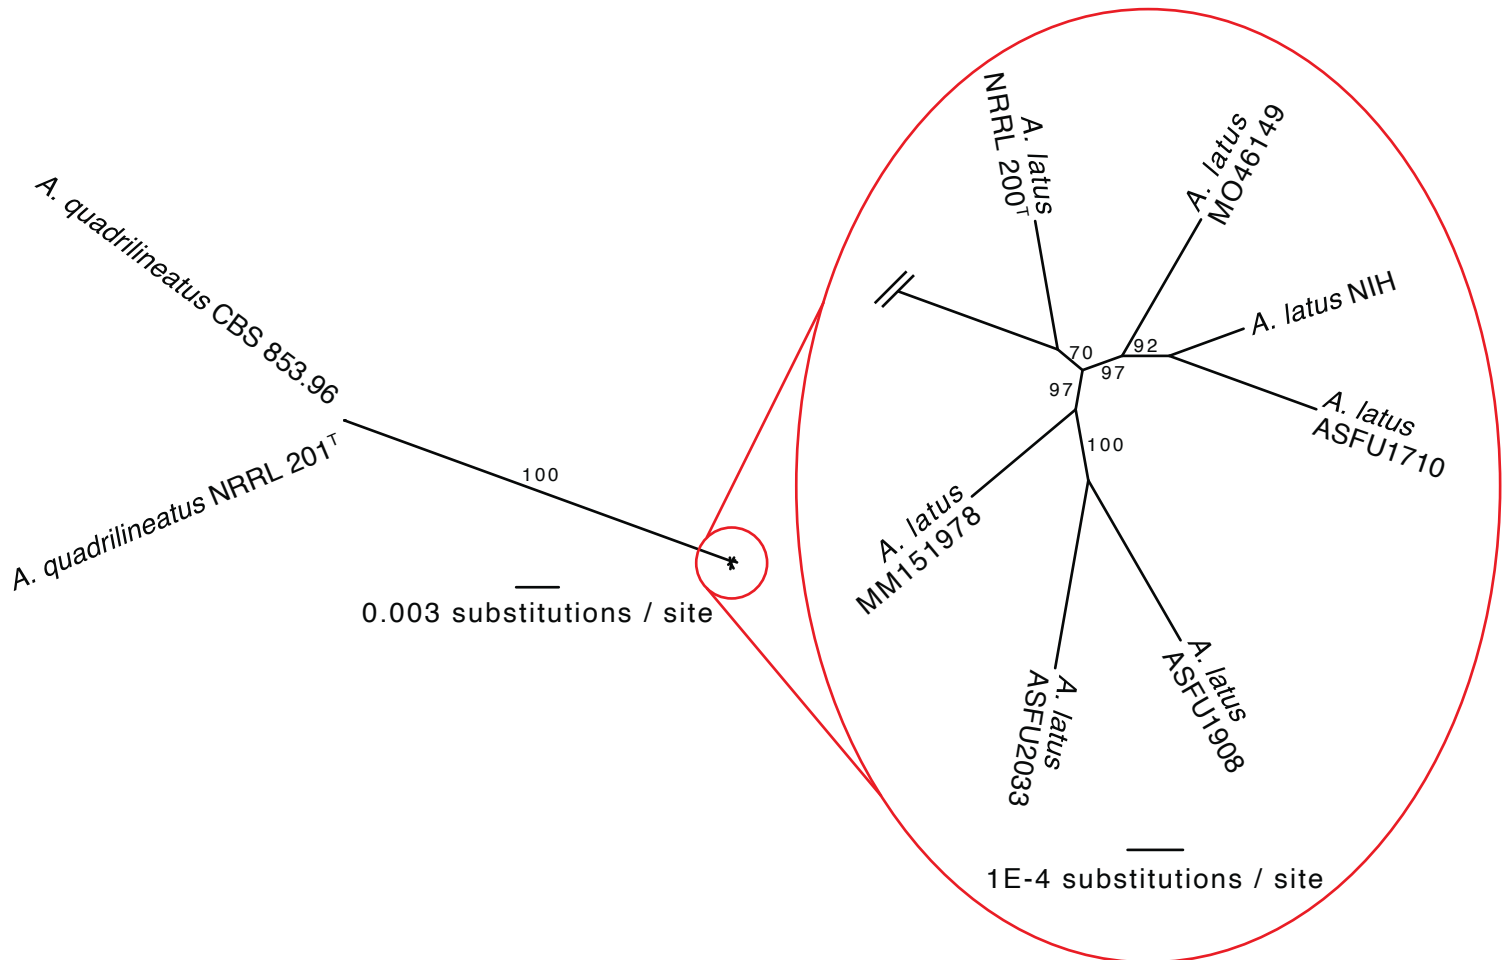

**Figure S3. The evolutionary histories of the two parental genomes of *A. latus* hybrid isolates are consistent with each other and support genome-wide instability in the *A. latus* type strain NRRL 200. Related to Figure 2 and Data S1.** Evolutionary histories were reconstructed from data matrices of single-copy orthologous genes from either the (A) *A. latus* parental genome from *A. spinulosporus* and true *A. spinulosporus* strains or (B) *A. latus* parental genome from *A. quadrilineatus*-like species and true *A. quadrilineatus* strains. While the two topologies differ, application of approximately unbiased topology constraint tests showed that the two topologies were not statistically different from each other (p-value = 0.50 for both tests). These results are consistent with the hypothesis that the two parental genomes of *A. latus* share the same evolutionary history. The long branch of *A. latus* NRRL 200 inferred using the *A. spinulosporus* phylogenomic data matrix likely reflects potential genomic instability. Branch lengths represent substitutions per site. Bipartition support was assessed using 5,000 ultrafast bootstrap approximations.

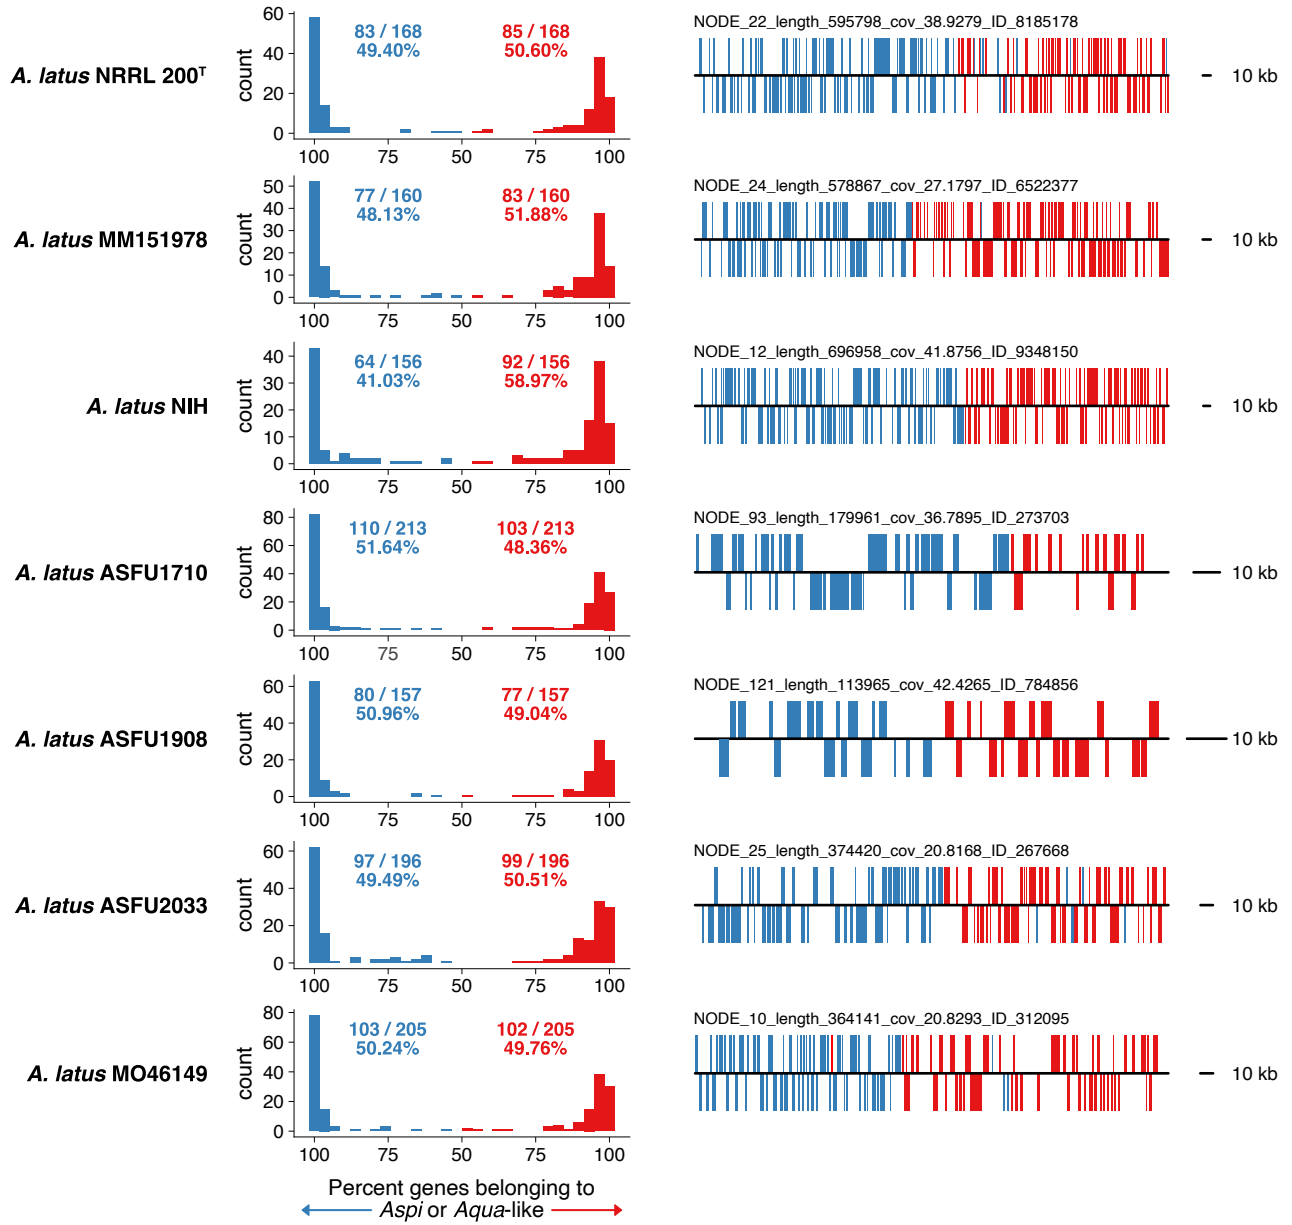

**Figure S4. Lack or very low levels of recombination between the parental genomes. Related to Figure 2 and Data S1.** For each genomic contig of each *A. latus* hybrid, we examined the percentage of genes that came from one or the other parent (left column); exemplary contigs (one for each hybrid) that are putatively the result of a recombinant event are shown on the right column. Contig of origin analysis was conducted by examining the percentage of genes on long contigs ( $\geq 100$  kb in length) from either the *A. spinulosporus* parent (*Aspi*; blue) or the *A. quadrilineatus*-like parent (*Aqua*-like; red). Contigs that are predominantly of *A. spinulosporus* are shown on the left side of the distributions and contigs that are predominantly *A. quadrilineatus*-like on the right side. We considered contigs that contained substantial percentages of genes from both parents to be putatively recombinant. For example,  $2.67 \pm 0.71\%$  of *A. latus* hybrid contigs contain between 35% and 65% of genes from both parents. Exemplary contigs with evidence of recombination contain genes from the *A. spinulosporus* parent on one side and genes from the *A. quadrilineatus*-like parent on the other. Contigs are represented by black lines a key for contig length is shown to the right. For each contig, the entirety of the contig is depicted and the contig identifier is also provided. Genes on different strands of DNA are depicted either above or below the black line.



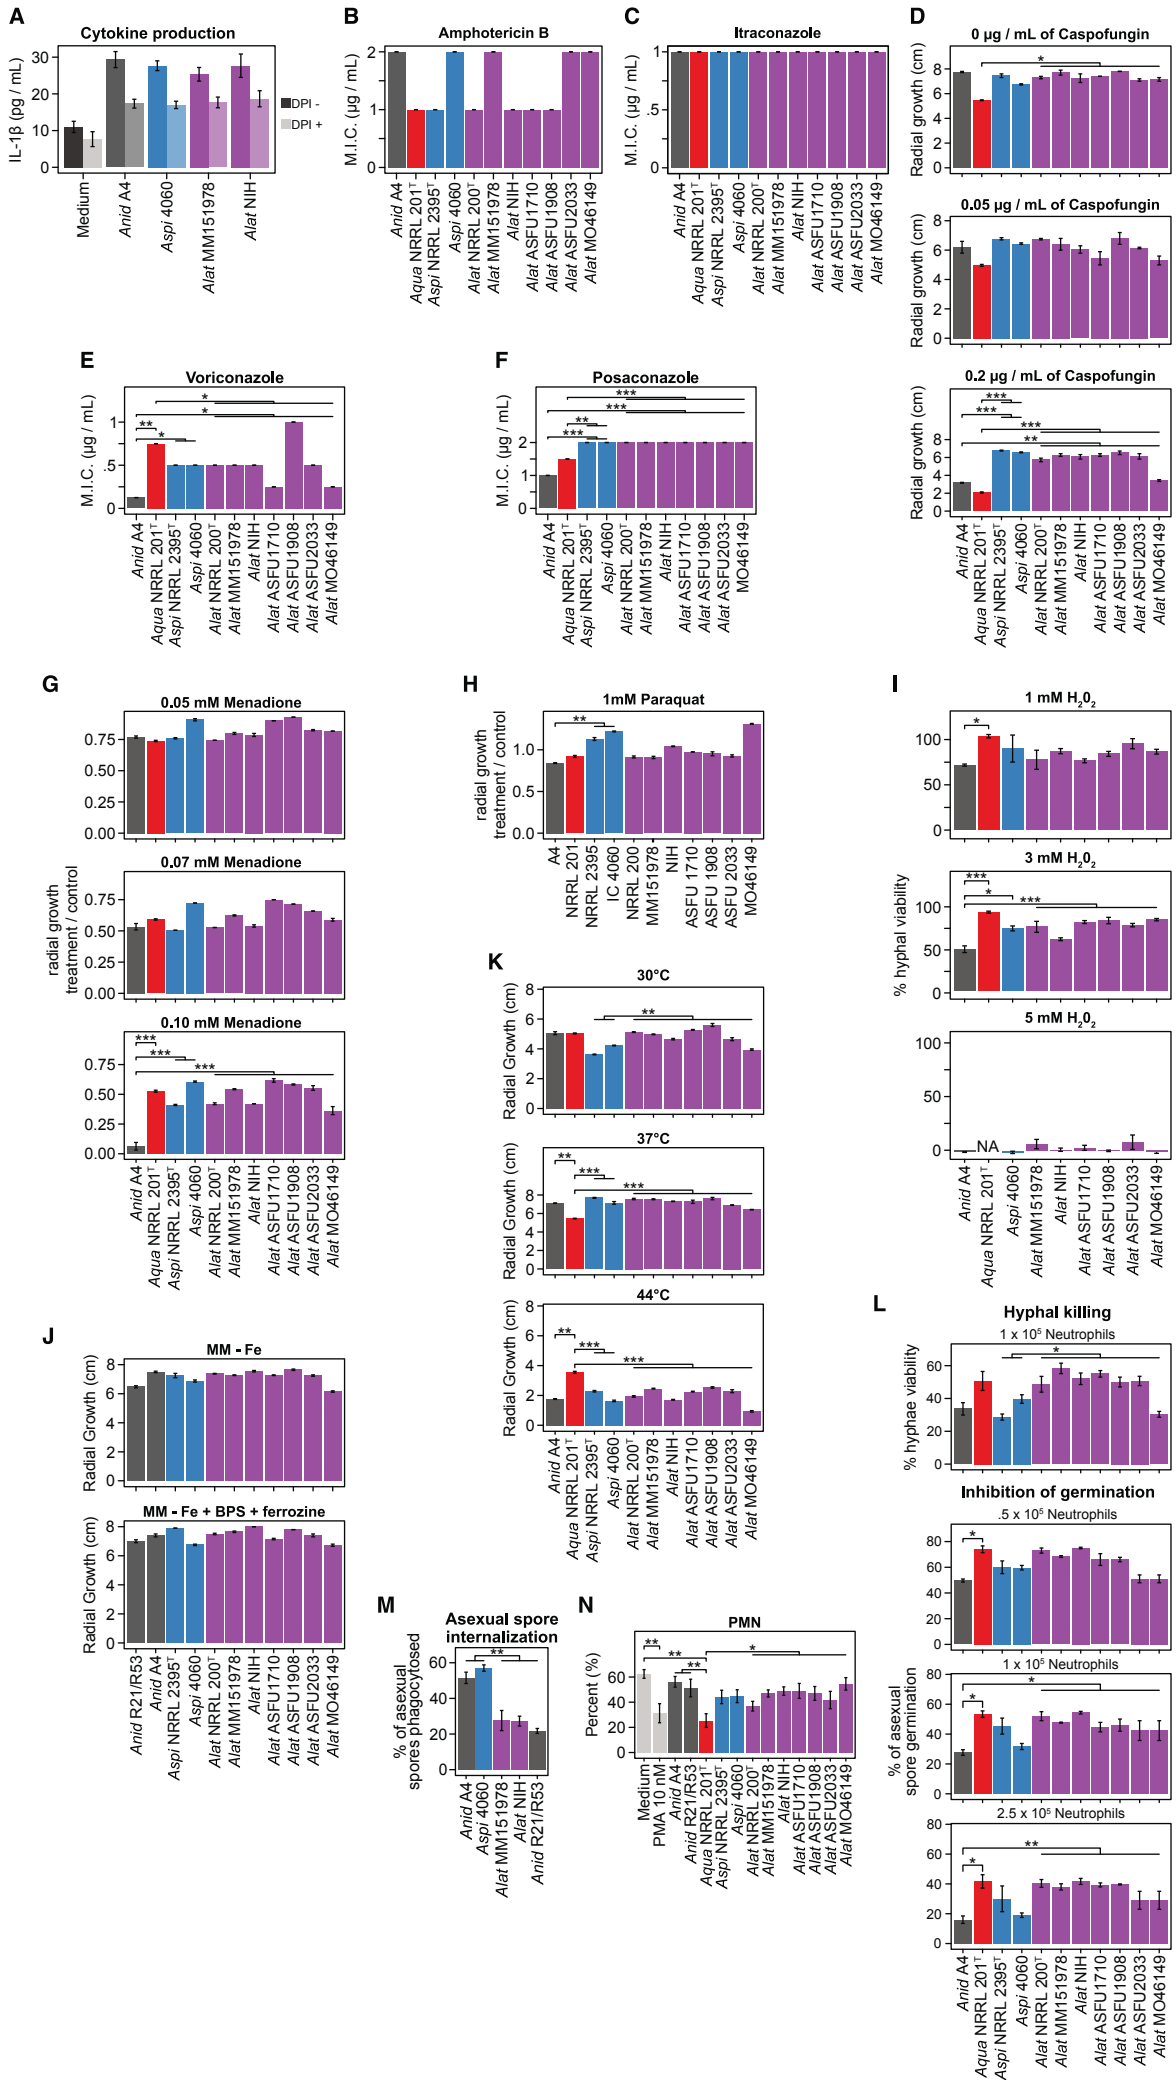

**Figure S5. Phenotypic characterization of diverse infection-relevant traits among *A. nidulans*, *A. spinulosporus*, *A. quadrilineatus*, and *A. latus* hybrid isolate and strains.**

**Related to Figure 3.** (A) Examination of cytokine production (i.e., macrophage response) to co-culture with no *Aspergillus* species, *A. nidulans* A4, *A. spinulosporus* strain 4060, and *A. latus* strain MM151978 and NIH revealed no significant difference in cytokine production with and without diphenylene iodonium (DPI). (B and C) Examination of minimum inhibitory concentration (MIC) in amphotericin B and itraconazole revealed no statistically significant difference between the various species. (D) Examination of susceptibility to caspofungin revealed statistically significant differences in some concentrations, which are shown and discussed in Figure 3. (E) Statistically significant differences in MIC of voriconazole among the various species ( $\chi^2 = 14.44$ ,  $df = 3$ ,  $p = 0.002$ ; Kruskal-Wallis rank sum test). (F) Examination of the MIC for posaconazole reveals significant differences among the various species ( $\chi^2 = 32$ ,  $df = 3$ ,  $p < 0.001$ ; Kruskal-Wallis rank sum test). (G) Examination of radial growth in the presence of the oxidative stressor menadione revealed significant differences among the three species at different concentrations of menadione ( $F(6) = 7.01$ ,  $p < 0.001$ ; Multi-factor ANOVA). (H) Statistically significant differences were observed in the growth of paraquat (see also Figure 3). (I) Significant differences in radial growth among *A. nidulans*, *A. spinulosporus*, and *A. latus* hybrids in the presence of  $H_2O_2$  ( $F(6) = 3.00$ ,  $p = 0.009$ ; Multi-factor ANOVA). (J) No statistically significant differences were observed in iron starvation assays. (K) Significant differences were observed in the growth of the various species at different temperatures ( $F(6) = 15.65$ ,  $p < 0.001$ ; Multi-factor ANOVA). (M) Significant differences were observed in asexual spore internalization by macrophages between diploid (*A. latus* MM151978, *A. latus* NIH, and *A. nidulans* R21/R53) and haploid genomes (*A. nidulans* A4 and *A. spinulosporus* 4060) ( $p < 0.001$ ;

Wilcoxon Rank Sum test). (N) Statistically significant differences were observed in NETosis. Shown here is the percentage of Human polymorphonuclear cells surviving co-culture with the fungus (see also Figure 3). (L) Statistically significant differences were observed in hyphal killing by macrophages (see also Figure 3). Additionally, significant differences were observed in the inhibition of fungal germination by macrophages among the various species ( $F(3) = 20.61$ ,  $p < 0.001$ ; Multi-factor ANOVA). For multi-factor ANOVAs, all pairwise comparisons were made using a Tukey Honest Significant differences test; for Kruskal-Wallis rank sum tests, pairwise comparisons were made using a Dunn's test with multi-test correction using the Benjamini-Hochberg procedure. \* represents p-values less than 0.05 but greater than 0.01; \*\* represents p-values less than 0.01 but greater than 0.001; \*\*\* represents p-values less than 0.001.

| Genome                                            | Genome Size | N50*    | Number of genes |
|---------------------------------------------------|-------------|---------|-----------------|
| <i>A. quadrilineatus</i><br>NRRL 201 <sup>T</sup> | 32,509,921  | 293,960 | 10,234          |
| <i>A. quadrilineatus</i><br>CBS 853.96            | 34,797,351  | 229,104 | 11,183          |
| 4060                                              | 31,665,638  | 425,600 | 9,499           |
| <i>A. latus</i> NRRL 200 <sup>T</sup>             | 62,482,878  | 383,812 | 18,918          |
| MM151978                                          | 64,066,396  | 422,061 | 19,490          |
| NIH                                               | 66,248,764  | 400,658 | 19,760          |
| ASFU1710                                          | 78,387,730  | 125,661 | 24,333          |
| ASFU1908                                          | 74,406,717  | 73,356  | 24,753          |
| ASFU2033                                          | 69,995,940  | 181,936 | 21,380          |
| MO46149                                           | 68,059,968  | 124,885 | 20,617          |

**Table S1. Genome assembly size, N50, and number of predicted genes. Related to Figure 1.**

**\*N50: the contig size where 50% of the genome assembly is contained in contigs equal or larger than its size.**

| <b>Genome</b>                                     | <b>Total</b> | <b>Type<br/>1 PKS</b> | <b>NRPS</b> | <b>Type<br/>3 PKS</b> | <b>Terpene</b> | <b>Indole</b> | <b>Multiple</b> | <b>Other</b> |
|---------------------------------------------------|--------------|-----------------------|-------------|-----------------------|----------------|---------------|-----------------|--------------|
| <i>A. nidulans</i><br>A4                          | 53           | 18                    | 9           | 0                     | 6              | 3             | 7               | 10           |
| <i>A. quadrilineatus</i><br>NRRL 201 <sup>T</sup> | 69           | 26                    | 10          | 0                     | 10             | 4             | 7               | 12           |
| <i>A. spinulosporus</i><br>NRRL2395               | 53           | 19                    | 8           | 0                     | 9              | 3             | 7               | 7            |
| 4060                                              | 54           | 20                    | 8           | 0                     | 9              | 3             | 7               | 7            |
| <i>A. latus</i><br>NRRL 200 <sup>T</sup>          | 111          | 41                    | 16          | 0                     | 14             | 6             | 16              | 18           |
| MM151978                                          | 115          | 43                    | 16          | 0                     | 15             | 7             | 17              | 17           |
| NIH                                               | 114          | 42                    | 18          | 0                     | 15             | 6             | 16              | 17           |
| ASFU1710                                          | 123          | 47                    | 17          | 0                     | 15             | 7             | 16              | 21           |
| ASFU1908                                          | 131          | 54                    | 20          | 1                     | 19             | 8             | 10              | 19           |
| ASFU2033                                          | 120          | 48                    | 17          | 0                     | 17             | 8             | 13              | 17           |
| MO46149                                           | 116          | 46                    | 18          | 0                     | 17             | 6             | 10              | 19           |

**Table S2. Number of predicted secondary metabolic gene clusters per genome. Related to**

**Figure 1.**

| <b>Genome Assembly or Raw Reads</b> | <b>BioProject</b> | <b>BioSample</b> | <b>Accession</b> | <b>Genus</b>       | <b>Species</b>       | <b>Strain</b> |
|-------------------------------------|-------------------|------------------|------------------|--------------------|----------------------|---------------|
| Genome Assembly                     | PRJNA542678       | SAMN11621154     | VCRF0000000000   | <i>Aspergillus</i> | <i>spinulosporus</i> | 4060          |
| Genome Assembly                     | PRJNA542678       | SAMN11615383     | VCRG0000000000   | <i>Aspergillus</i> | <i>latus</i>         | MO46149       |
| Genome Assembly                     | PRJNA542678       | SAMN11615382     | VCRH0000000000   | <i>Aspergillus</i> | <i>latus</i>         | ASFU2033      |
| Genome Assembly                     | PRJNA542678       | SAMN11615381     | VCRI0000000000   | <i>Aspergillus</i> | <i>latus</i>         | ASFU1908      |
| Genome Assembly                     | PRJNA542678       | SAMN11615380     | VCRJ0000000000   | <i>Aspergillus</i> | <i>latus</i>         | ASFU1710      |

|                        |                 |                   |                   |                         |                            |                          |
|------------------------|-----------------|-------------------|-------------------|-------------------------|----------------------------|--------------------------|
| Genome<br>Assemb<br>ly | PRJNA542<br>678 | SAMN11615<br>379  | VCRK000000<br>00  | <i>Aspergill<br/>us</i> | <i>latus</i>               | NIH                      |
| Genome<br>Assemb<br>ly | PRJNA542<br>678 | SAMN11615<br>378  | VCRL000000<br>00  | <i>Aspergill<br/>us</i> | <i>latus</i>               | MM1519<br>78             |
| Genome<br>Assemb<br>ly | PRJNA542<br>141 | SAMN11612<br>423  | VCRM000000<br>000 | <i>Aspergill<br/>us</i> | <i>latus</i>               | NRRL<br>200 <sup>T</sup> |
| Genome<br>Assemb<br>ly | PRJNA623<br>402 | See<br>BioProject | See<br>BioProject | <i>Aspergill<br/>us</i> | <i>quadrilinea<br/>tus</i> | NRRL<br>201 <sup>T</sup> |
| Raw<br>Reads           | PRJNA542<br>395 | N/A               | N/A               | <i>Aspergill<br/>us</i> | <i>spinulospor<br/>us</i>  | 4060                     |
| Raw<br>Reads           | PRJNA542<br>181 | N/A               | N/A               | <i>Aspergill<br/>us</i> | <i>latus</i>               | MO4614<br>9              |
| Raw<br>Reads           | PRJNA542<br>181 | N/A               | N/A               | <i>Aspergill<br/>us</i> | <i>latus</i>               | ASFU20<br>33             |
| Raw<br>Reads           | PRJNA542<br>181 | N/A               | N/A               | <i>Aspergill<br/>us</i> | <i>latus</i>               | ASFU19<br>08             |
| Raw<br>Reads           | PRJNA542<br>181 | N/A               | N/A               | <i>Aspergill<br/>us</i> | <i>latus</i>               | ASFU17<br>10             |

|           |          |                |                |                    |                      |        |
|-----------|----------|----------------|----------------|--------------------|----------------------|--------|
| Raw Reads | PRJNA542 | N/A            | N/A            | <i>Aspergillus</i> | <i>latus</i>         | NIH    |
| Raw Reads | PRJNA542 | N/A            | N/A            | <i>Aspergillus</i> | <i>latus</i>         | MM1519 |
| Raw Reads | PRJNA542 | N/A            | N/A            | <i>Aspergillus</i> | <i>latus</i>         | NRRL   |
| Raw Reads | PRJNA623 | See BioProject | See BioProject | <i>Aspergillus</i> | <i>quadriliensis</i> | NRRL   |

**Table S3. NCBI accession information for each sequenced genome.**
